# Supplementary material
Source: PubMed Central journal article supplement (PMC6258921)
Supplement: ba019026-suppl1.pdf [file ba019026-suppl1.pdf]

## Supplemental Data

**Figure S1. Linear depiction of lentiviral constructs containing IL-15, IL-15R $\alpha$ , and CD80.**

**Figure S2. 32Dp210 leukemia suppresses adaptive immune effector populations and increases immunosuppressive cell types in the spleens of leukemia-bearing mice.** The frequency of different immune effector populations in the spleen were analyzed by flow cytometric analyses in normal, naive C3H mice, and 14 days after leukemia inoculation, in 32Dp210 leukemia-bearing mice (32Dp210-AML). The percentage of each cell type in each subject are indicated. (A) percent CD3+CD4+ T cells, (B) percent CD4+CD8+ T cells, (C) frequency of CD44<sup>hi</sup> CD3+CD4+ T cells, (D) frequency of CD44<sup>hi</sup> CD3+CD8+ T cells, (E) percent CD4+FoxP3+ T regulatory cells (T<sub>REG</sub>), and (F) percent CD11b+Ly6G+ myeloid derived suppressor cells (MDSC). \*p<0.05, \*\*p<0.01, \*\*\*p<0.001; Error bars = S.E.M.

**Figure S3. 32Dp210 leukemia decreases the absolute numbers of adaptive immune effector populations and increases the numbers of immunosuppressive cell types in the spleens of leukemia-bearing mice.** Changes in the absolute numbers of immune effector populations and the percentages detected for CD4+FoxP3+ T regulatory cells (T<sub>REG</sub>), percent CD11b+Ly6G+ myeloid derived suppressor cells (MDSC), percent CD3+CD4+ T cells, and percent CD4+CD8+ T cells, similar to those shown in **Supplemental Data B**, were observed.

**Table S1: GCV treatment has no major effects on cell populations in peripheral blood.** After administration of 100 mg/kg GCV daily for 14 days in non-tumor bearing C3H mice, complete blood counts and analyses of different populations in peripheral blood were compared with those of mice treated with PBS as controls.

Figure S1.

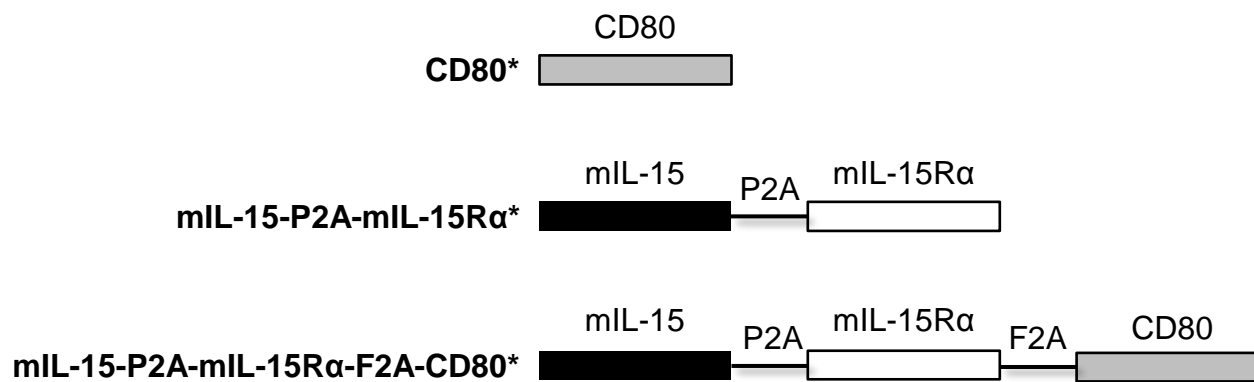

Figure S2

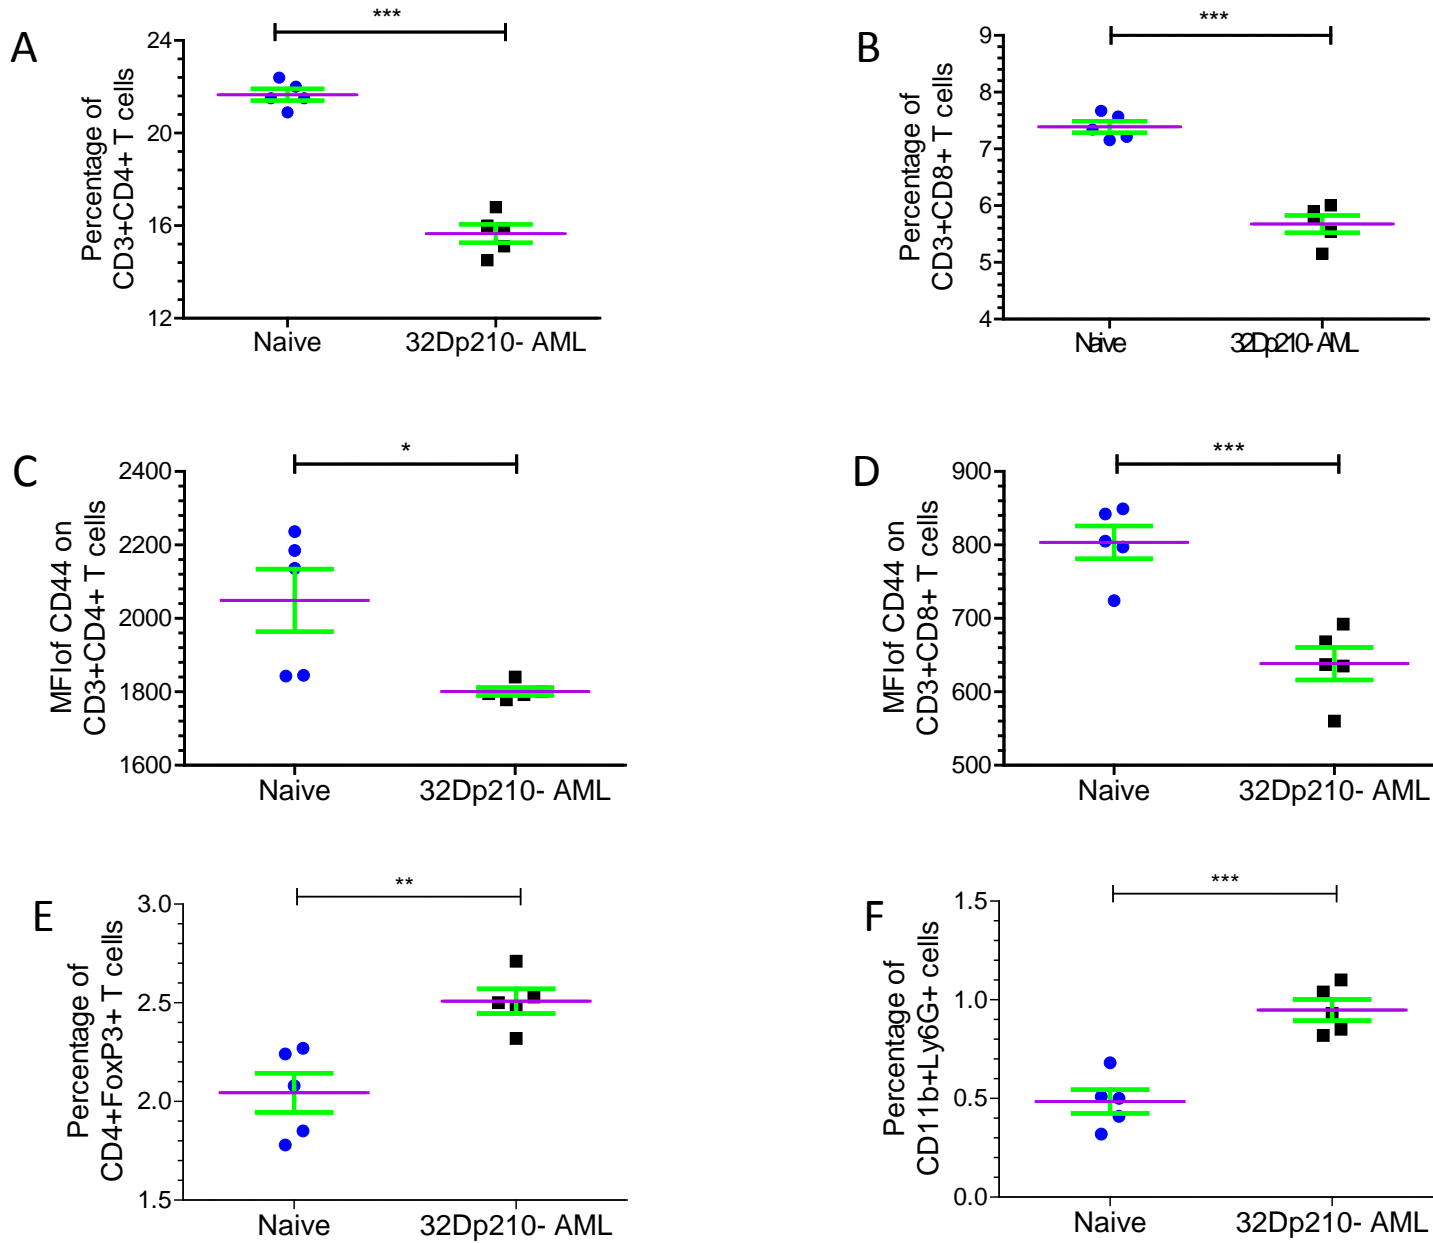

Figure S3

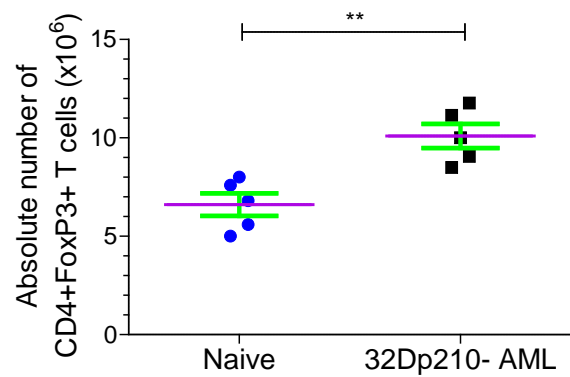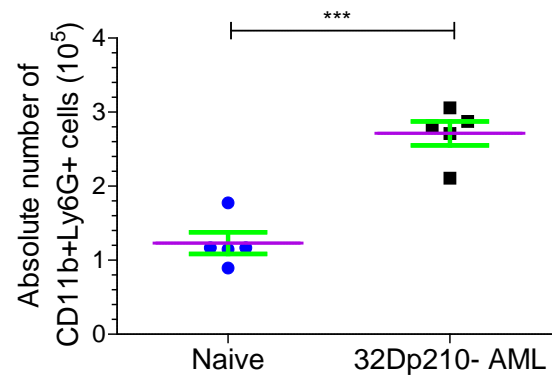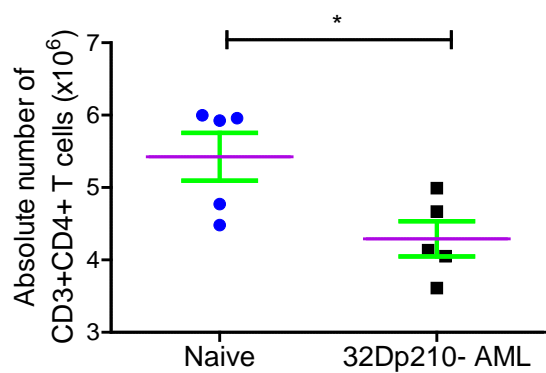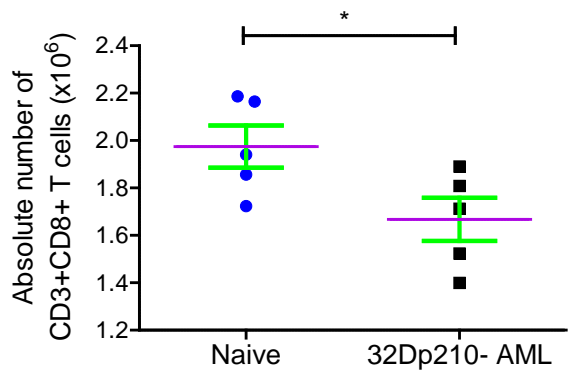

## Table S1

Table 1: Effect of GCV on CBC

| <u>(k/<math>\mu</math>L)</u> | <u>PBS</u>         | <u>GCV</u>         | <u>P-value</u> |
|------------------------------|--------------------|--------------------|----------------|
| <b>White Blood Cells</b>     | 8.512 $\pm$ 0.610  | 6.638 $\pm$ 0.575  | 0.064          |
| <b>Neutrophils</b>           | 4.068 $\pm$ 0.568  | 4.141 $\pm$ 0.580  | 0.938          |
| <b>Lymphocytes</b>           | 3.682 $\pm$ 0.208  | 2.036 $\pm$ 0.279  | 0.002          |
| <b>Monocytes</b>             | 0.5100 $\pm$ 0.077 | 0.310 $\pm$ 0.0364 | 0.018          |
